# Supplementary material for: Processing milk causes the formation of protein oxidation products which impair spatial learning and memory in rats
Source: Royal Society of Chemistry journal article supplement (doi:10.1039/c9ra03223a), 2019-01-01
Supplement: c9ra03223a1.pdf [file c9ra03223a1.pdf]

**Table S1** Fat and protein content in spray-dried and frozen-dried powder

| Group                          | Fat content (g/100g) | Protein content (g/100g) |
|--------------------------------|----------------------|--------------------------|
| Spray-dried whole milk powder  | 26.5                 | 20                       |
| Frozen-dried whole milk powder | 26                   | 22                       |

**Table S2** Formula of diets containing milk powder at different degrees of oxidation <sup>a</sup>

| Ingredient (g/ kg diet)  | SWM    | FWM    | FWM+LDT | FWM+HDT |
|--------------------------|--------|--------|---------|---------|
| Spray-dried milk powder  | 700    | 0      | 0       | 0       |
| Frozen-dried milk powder | 0      | 636.36 | 636.36  | 636.36  |
| Dityrosine               | 0      | 0      | 0.0014  | 0.0028  |
| Dextrinized cornstarch   | 100.70 | 144.29 | 144.29  | 144.29  |
| Sucrose                  | 100    | 100    | 100     | 100     |
| Soybean oil              | 0      | 20.05  | 20.05   | 20.05   |
| Fiber                    | 50     | 50     | 50      | 50      |
| Minerals mix             | 35     | 35     | 35      | 35      |
| Vitamins mix             | 10     | 10     | 10      | 10      |
| L-Cysteine               | 1.80   | 1.80   | 1.80    | 1.80    |
| Choline chloride         | 2.50   | 2.50   | 2.50    | 2.50    |

<sup>a</sup> The diet formula is slightly modified with reference to the AIN-93M. 180 °C inlet air temperature spray-dried milk powder content of 20g/100g protein, 26.5g/100g fat, and 1400pg/mg prot DT. Frozen-dried whole milk powder content of 22g/100g protein and 26g/100g fat. FWM+LDT group added 5 times DT higher than the SWM group is 1.4mg/kg, FWM+HDT group add 10 times higher DT than the SWM group is 2.8mg/kg.

**Table S3** Morris water maze platform location and starting direction

| Day 1   |                   |                    | Day2                                                   | Day3 | Day4 | Day5 | Day6         |
|---------|-------------------|--------------------|--------------------------------------------------------|------|------|------|--------------|
|         | Platform location | Starting direction | Platform Location: SW<br>Starting Location as follows: |      |      |      | No platform. |
| Trial 1 | SW                | S                  | W                                                      | N    | S    | E    | N            |
| Trial 2 | NW                | N                  | S                                                      | W    | E    | N    |              |
| Trial 3 | NE                | S                  | N                                                      | E    | W    | S    |              |
| Trial 4 | SE                | W                  | E                                                      | S    | N    | W    |              |
